# Supplementary material for: Long range structural and textural changes in [Zn(bdc)(ted)0.5] upon spontaneous dispersion of LiCl and hysteretic adsorption and desorption of carbon dioxide and hydrogen
Source: Royal Society of Chemistry journal article supplement (doi:10.1039/c2ta00907b), 2012-12-11
Supplement: c2ta00907b.pdf [file c2ta00907b.pdf]

## Supplementary Information Material

# Long Range Structural and Textural Changes in [Zn(bdc)(ted)<sub>0.5</sub>] upon Spontaneous Dispersion of LiCl and Hysteretic Adsorption and Desorption of Carbon Dioxide and Hydrogen

**Arturo J. Hernández-Maldonado,\***  
**Jennifer Guerrero-Medina and Valeria C. Arce-González**

Department of Chemical Engineering, University of Puerto Rico-Mayagüez Campus  
Mayagüez, PR 00681-9000

\* To whom correspondence should be addressed:  
Phone: 787-832-4040 x3748; Fax: 787-834-3655; E-mail: arturoj.hernandez@upr.edu

---

### **Content:**

ICP Compositional Analysis

Additional Adsorption Data

## 1. Compositional Data

The ICP-MS tests yielded the following (in wt.%):

- [Zn(bdc)(ted)0.5]: C 42.5, H 5.41, N: 7.57 and Zn 16.0
- (LiCl)[Zn(bdc)(ted)0.5]: C 36.8, H 3.33, N: 3.21, Zn 19.1 and Li 1.99

## 2. Additional Adsorption Data

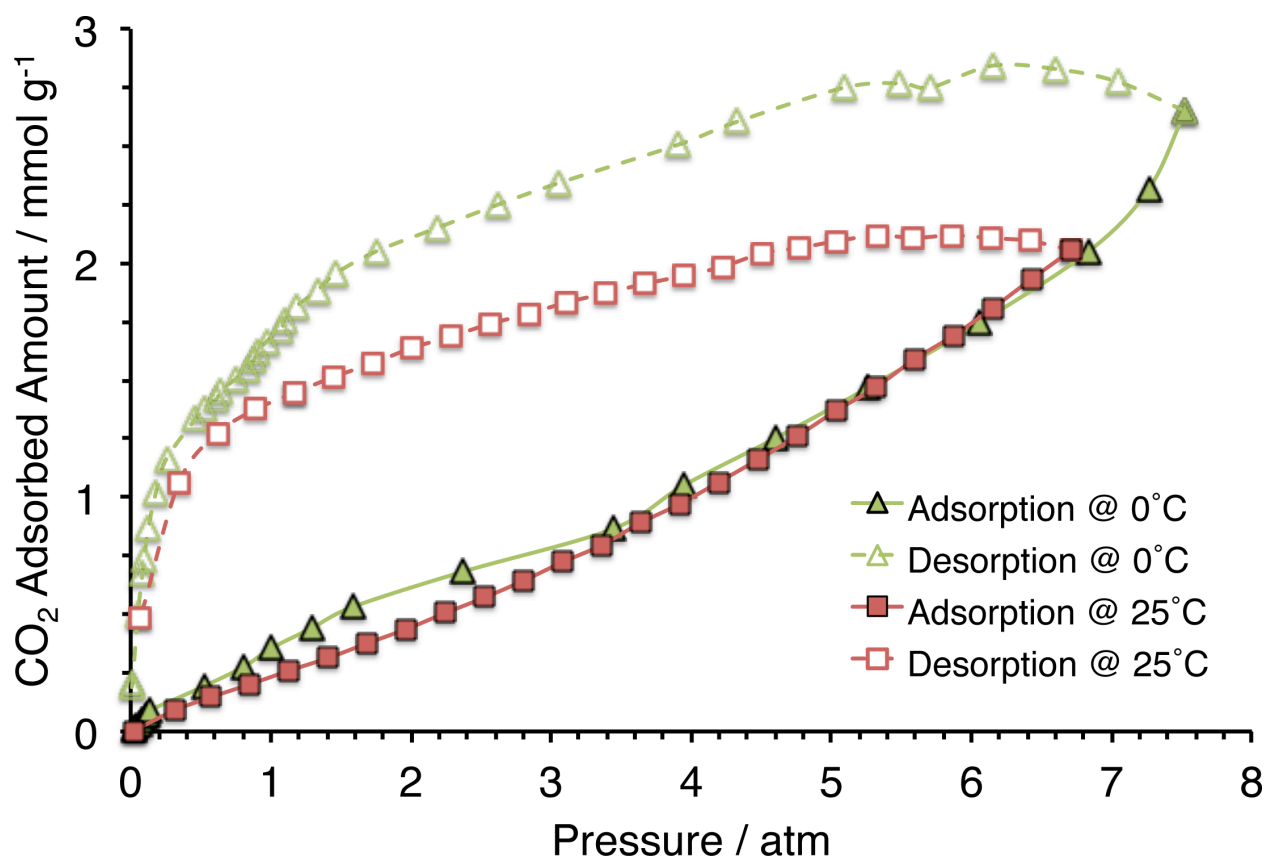

**Figure S1.** Carbon dioxide adsorption-desorption isotherms at different temperatures in (LiCl)[Zn(bdc)(ted)0.5].

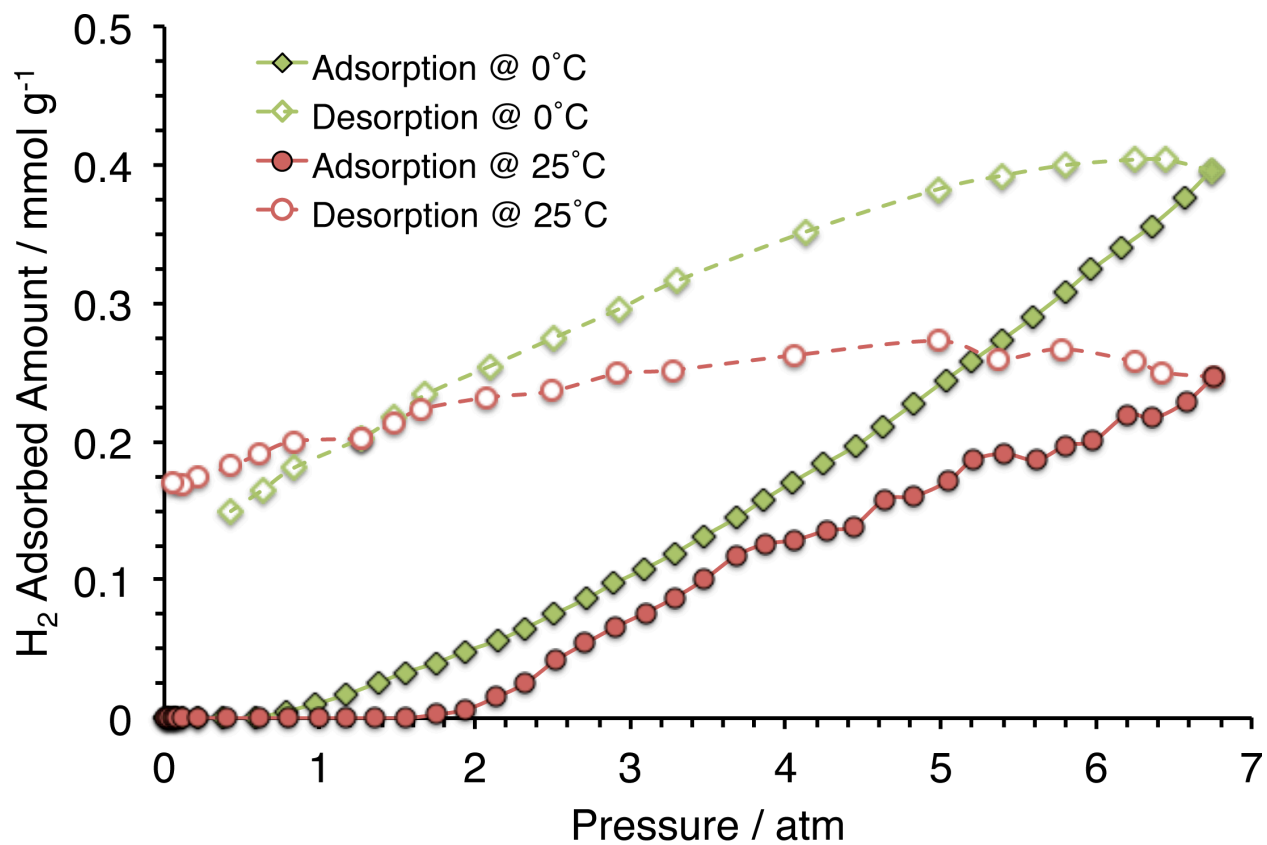

**Figure S2.** Hydrogen adsorption-desorption isotherms at different temperatures in  $(\text{LiCl})[\text{Zn}(\text{bdc})(\text{ted})_{0.5}]$ .
